# Supplementary material
Source: PubMed Central journal article supplement (PMC2519927)
Supplement: 00162.2008_1.pdf [file 00162.2008_1.pdf]

## Supplemental Methods

Immediately after blood collection, the abdominal wall was opened and the stomach was dissected from the cardiac to pyloric sphincter in all subjects and then was weighed with milk included. Liver was also dissected and immediately frozen at  $-70^{\circ}\text{C}$  for later determination of glycogen. Because of their unusual circadian feeding strategy rabbits could be said to fast 24 h every day because they are visited by the dam only once each day. In this experiment we considered that the animals were fasting only after a scheduled nursing bout was missed. However we chose to use the figure legend “Time after nursing” (0, 4, 8, ...48, 52 h, etc.) which seemed to us to most clearly describe the condition of our subjects. Using this calculus, the last 6 subjects were sacrificed after 48 h of fasting, or 72 h *after last nursing*.
